# Supplementary material for: Berberine Inhibits the Metastatic Ability of Prostate Cancer Cells by Suppressing Epithelial-to-Mesenchymal Transition (EMT)-Associated Genes with Predictive and Prognostic Relevance
Source: PubMed Central journal article supplement — Int J Med Sci. 2015 Jan 1;12(1):63–71. doi: 10.7150/ijms.9982 (PMC4278877; doi:10.7150/ijms.9982), 2015-01-01

## **Additional file 1**

Additional file 1 includes 1 Supplemental Table, and 4 Supplemental Figures.

### **Supplementary Figure Legends**

**Supplementary Figure 1.** Berberine-mediated regulation of expressions several key EMT effectors, including E-cadherin, vimentin, Twist and Snail. (A) Western blot analysis of the concentration-dependent effects of the berberine on the various EMT effectors in the PC-3 cells. (B) The mRNA expression levels of key EMT effectors are analyzed by EMT PCR Array experiments.

**Supplementary Figure 2.** Aberrant expressions of berberine-modulated EMT-related genes in different clinical stages of prostate cancer tissues. Relative expression levels of PDGFRB (A) and COL1A2 (B) in different clinical stages of prostate cancer tissues analyzed using the public GEO database. \*\*\*  $p < 0.001$ .

**Supplementary Figure 3.** Kaplan-Meier curves according to various combinations of three-, two- or single gene models. Overall survival for combinations of BMP7/NODAL/WNT11 (A), BMP7/WNT11 (B), NODAL/WNT11 (C), BMP7 (D), NODAL (E) and WNT11 (F) mRNA status of prostate cancer patients.

**Supplementary Figure 4.** Expression level and Kaplan-Meier curves of Snail in prostate cancer tissues. (A) Relative expression levels of Snail in different clinical stages of prostate cancer tissues analyzed using the public GEO database. Overall survival for Snail (B) or combinations of three-gene models of their mRNA status: BMP7/NODAL/SNAI1 (C) of prostate cancer patients. \*\*\*  $p < 0.001$ .

**Supplementary Table 1. 84 Epithelial-to-Mesenchymal Transition (EMT)-Associated Genes.**

|          | 1      | 2        | 3       | 4      | 5      | 6     | 7        | 8     | 9      | 10     | 11     | 12     |
|----------|--------|----------|---------|--------|--------|-------|----------|-------|--------|--------|--------|--------|
| <b>A</b> | AHNAK  | AKT1     | BMP1    | BMP2   | BMP7   | CALD1 | CAMK2N1  | CAV2  | CDH1   | CDH2   | COL1A2 | COL3A1 |
| <b>B</b> | COL5A2 | CTNNB1   | DSC2    | DSP    | EGFR   | ERBB3 | ESR1     | F11R  | FGFBP1 | FN1    | FOXC2  | FZD7   |
| <b>C</b> | GNG11  | GSC      | GSK3B   | IGFBP4 | IL1RN  | ILK   | ITGA5    | ITGAV | ITGB1  | JAG1   | KRT14  | KRT19  |
| <b>D</b> | KRT7   | MAP1B    | MMP2    | MMP3   | MMP9   | MSN   | MST1R    | NODAL | NOTCH1 | NUDT13 | OCLN   | PDGFRB |
| <b>E</b> | PLEK2  | PPPDE2   | PTK2    | PTP4A1 | RAC1   | RGS2  | SERPINE1 | SIP1  | SMAD2  | SNAI1  | SNAI2  | SNAI3  |
| <b>F</b> | SOX10  | SPARC    | SPP1    | STAT3  | STEAP1 | TCF3  | TCF4     | TFPI2 | TGFB1  | TGFB2  | TGFB3  | TIMP1  |
| <b>G</b> | TMEFF1 | TMEM132A | TSPAN13 | TWIST1 | VCAN   | VIM   | VPS13A   | WNT11 | WNT5A  | WNT5B  | ZEB1   | ZEB2   |

# Supplemental Figure 1

**A**

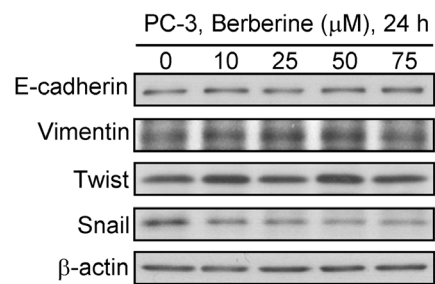

**B**

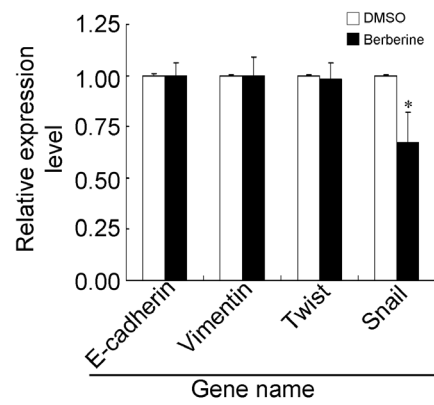

## Supplemental Figure 2

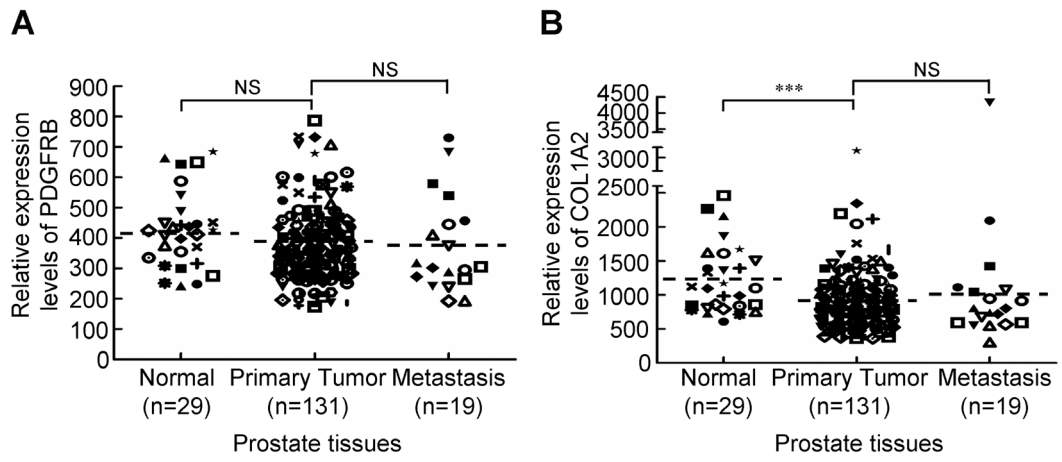

### Supplemental Figure 3

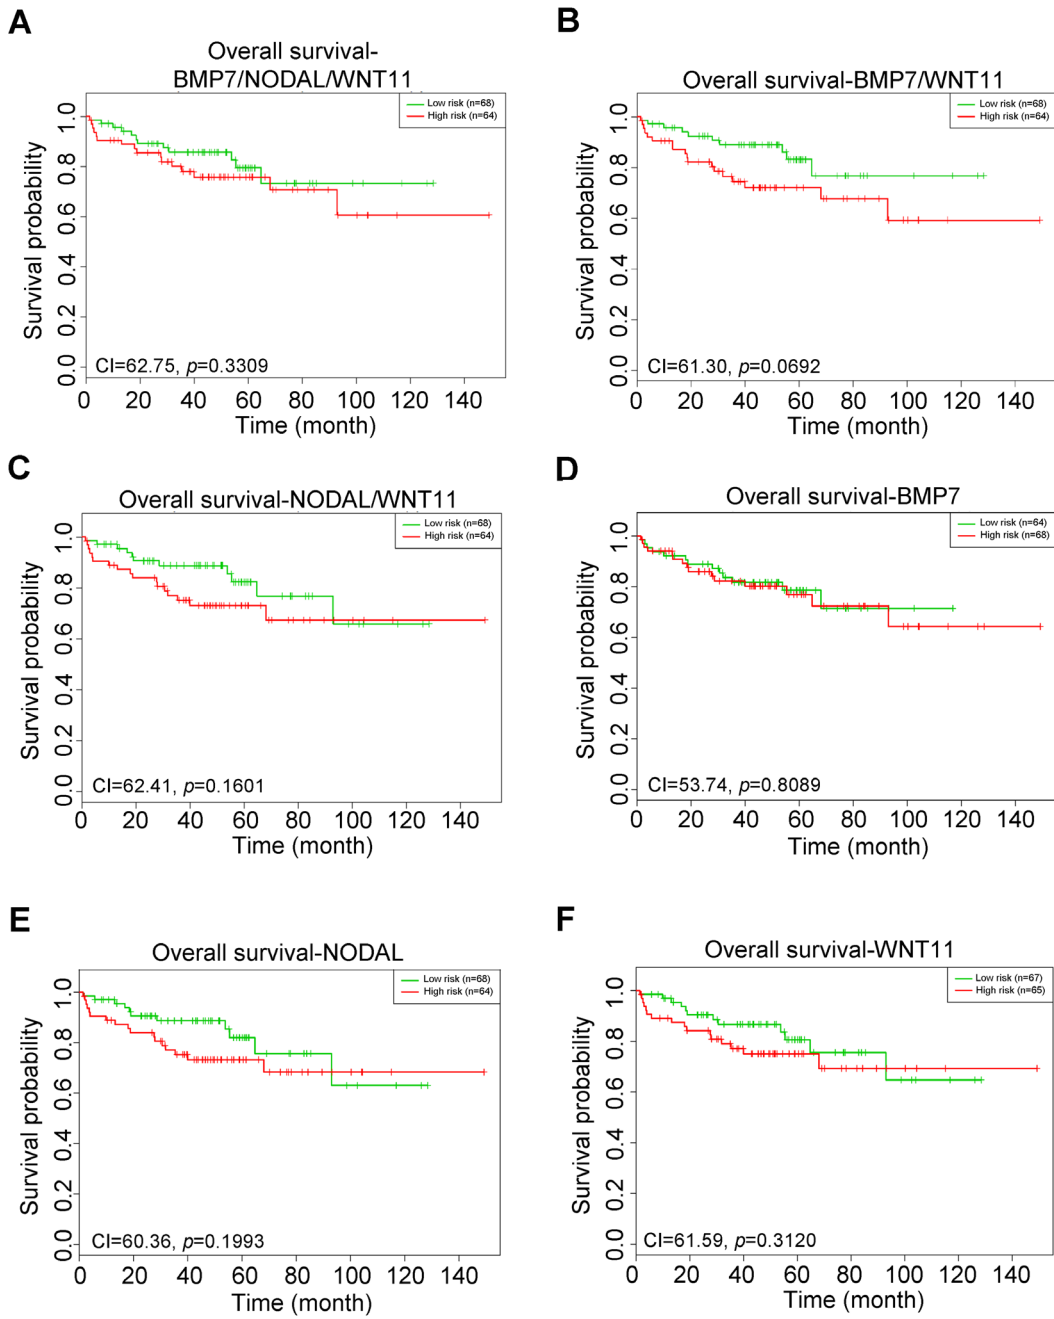

# Supplemental Figure 4

**A**

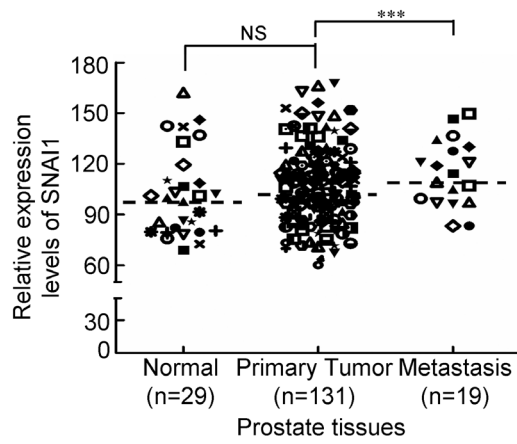

**B**

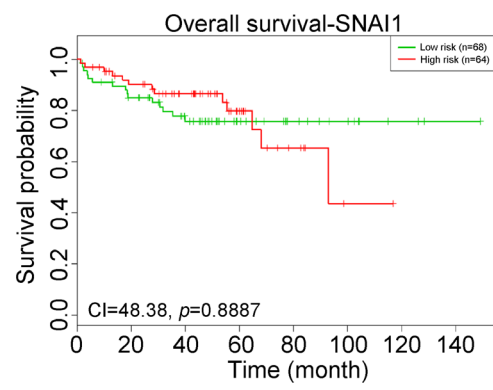

**C**

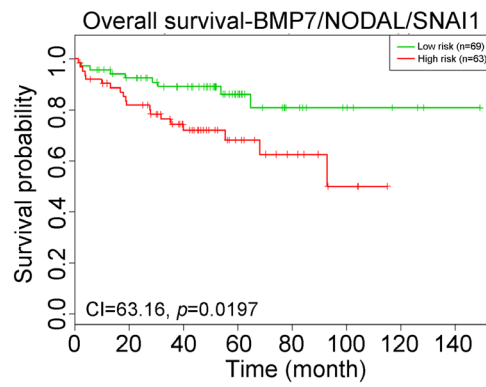

Supplement: ijmsv12p0063s1.pdf [file ijmsv12p0063s1.pdf]
